# Supplementary material for: EphA Receptors Form a Complex with Caspase-8 to Induce Apoptotic Cell Death
Source: PubMed Central journal article supplement — Mol Cells. 2015 Apr 7;38(4):349–55. doi: 10.14348/molcells.2015.2279 (PMC4400310; doi:10.14348/molcells.2015.2279), 2015-04-07
Supplement: molce-38-4-349-supple.pdf [file molce-38-4-349-supple.pdf]

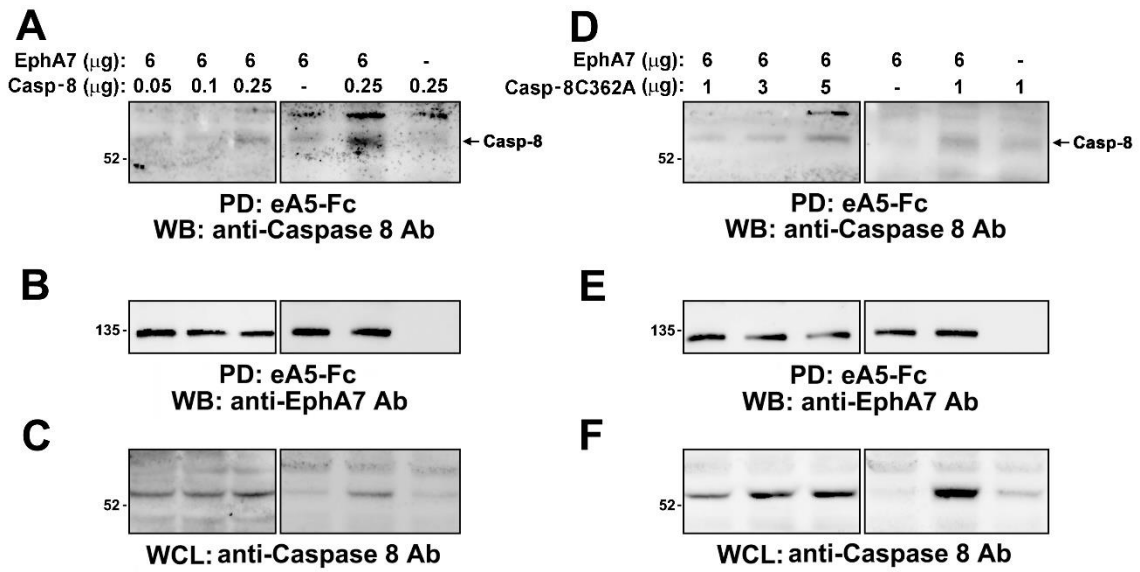

**Supplementary Figure 1. EphA7 interacts with caspase-8 to induce apoptotic cell death.**

(A–D) HEK293 cells were transiently transfected with the indicated constructs. Six  $\mu\text{g}$  of EphA7 expression vector was mixed with 0.25  $\mu\text{g}$  of caspase-8 expression vector. The cells were washed, fixed, and subjected to immunocytochemical staining using anti-cleaved caspase-3 antibody to detect apoptotic cells 16 hr post-transfection. Nuclear staining was performed using DAPI. (E) Apoptotic cells in each microscopic field ( $\times 200$ ) were counted in five different fields per dish. Data were obtained from three independent experiments and are shown as means  $\pm$  standard errors.  $*P < 0.001$ ; single-factor analysis of variance.
